# Supplementary material for: TiO2 Nanomaterials Non-Controlled Contamination Could Be Hazardous for Normal Cells Located in the Field of Radiotherapy
Source: MDPI journal article supplement (doi:10.3390/ijms21030940), 2020-01-31
Supplement: s1 [file s1]

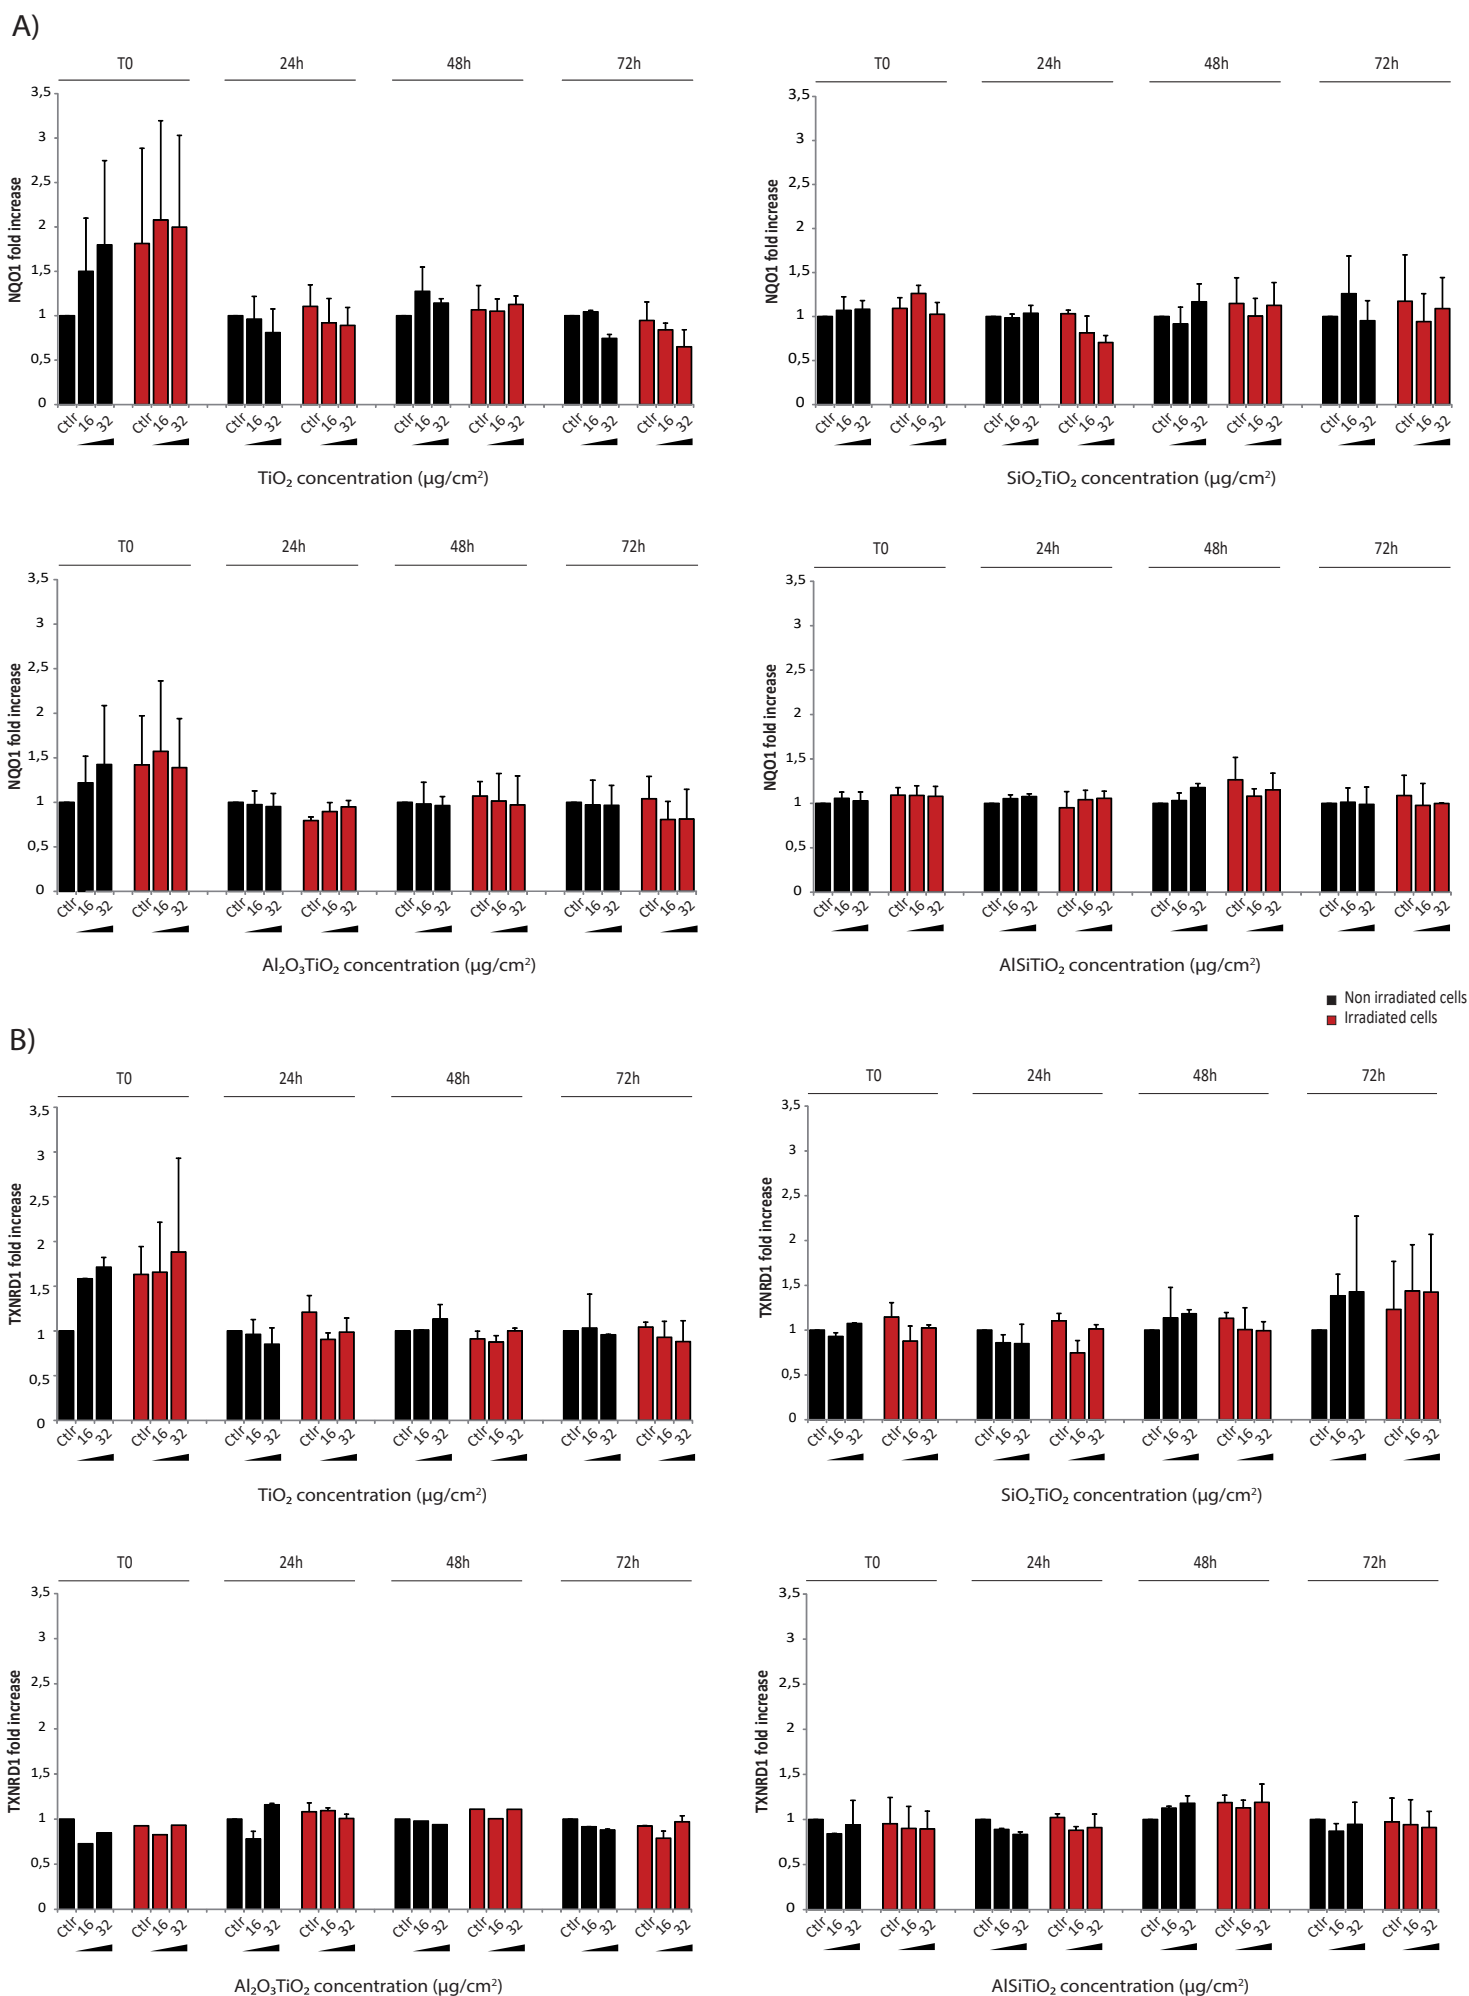

**Fig. S5: Detection of NQO1 and TXNRD1 expression by quantitative RT-PCR.**

A) Detection of NQO1 gene expression and B) TXNRD1 gene expression immediately (T0), 24h, 48h or 72h after treatment with or without a 4Gy irradiation.

Representative dot plots normalized by the value of the untreated non-irradiated control for each time point (means  $\pm$  S.D.,  $n=2$ ).
