# Supplementary material for: TiO2 Nanomaterials Non-Controlled Contamination Could Be Hazardous for Normal Cells Located in the Field of Radiotherapy
Source: MDPI journal article supplement (doi:10.3390/ijms21030940), 2020-01-31
Supplement: s1 [file s1]

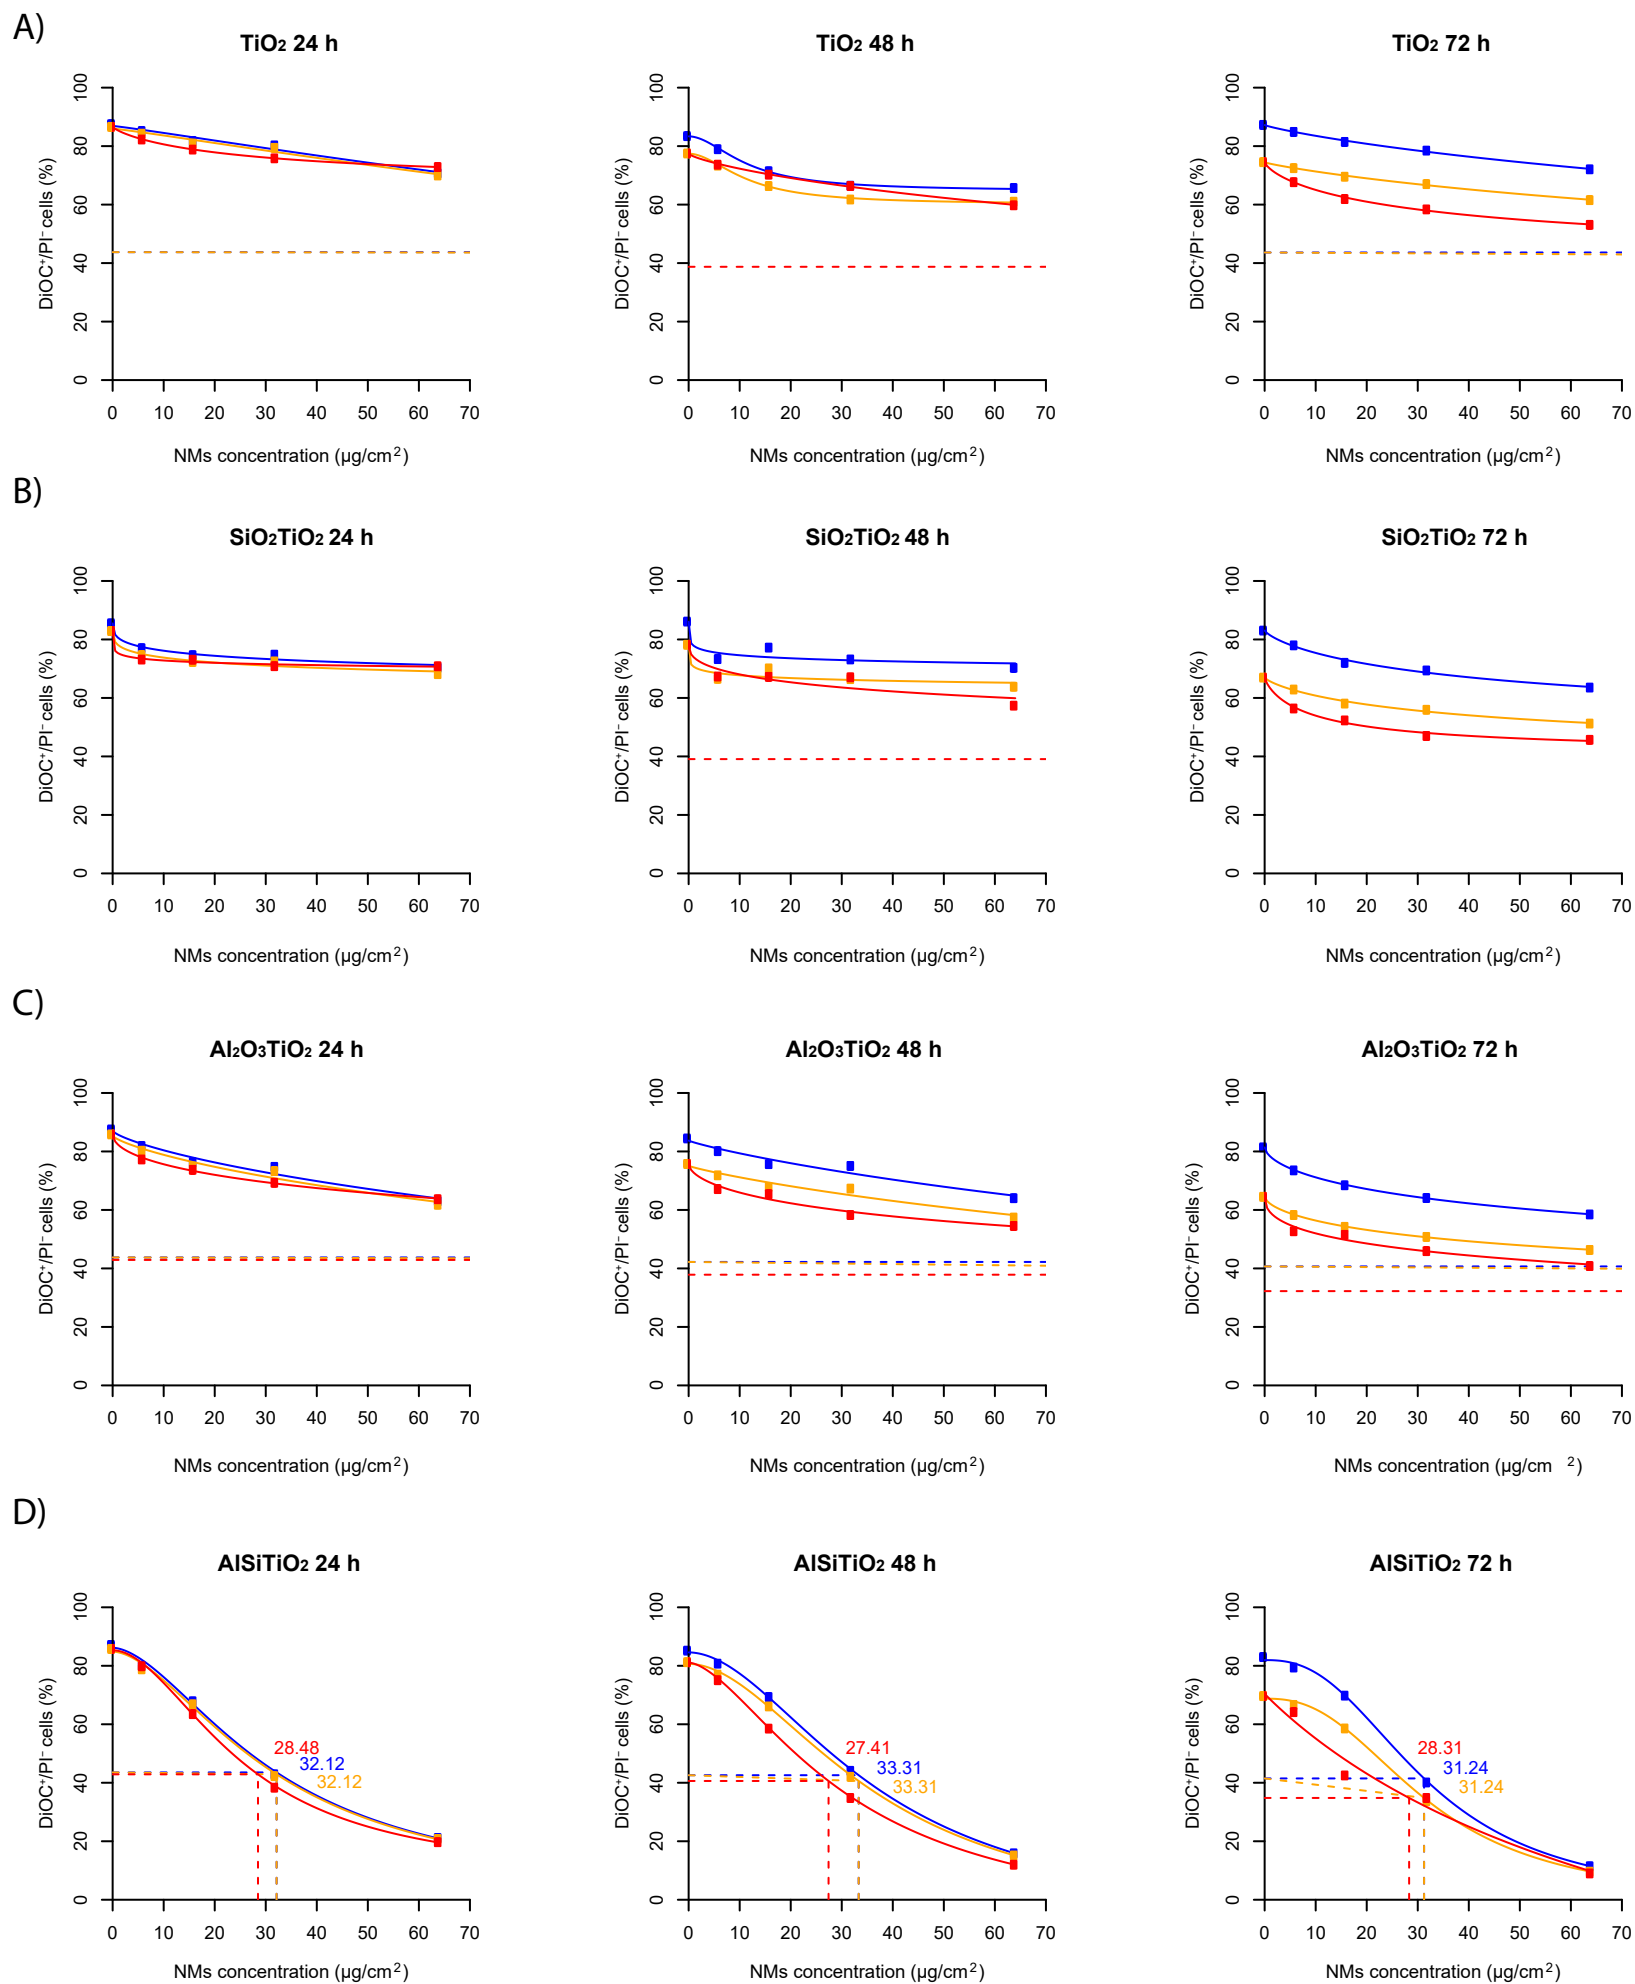

**Fig. S4: Synergy study between each type of TiO<sub>2</sub> and a 4Gy irradiation.**

The log-logistic model simulates the theoretical effect between a 4Gy irradiation and A) TiO<sub>2</sub>, B) SiO<sub>2</sub>TiO<sub>2</sub>, C) Al<sub>2</sub>O<sub>3</sub>TiO<sub>2</sub>, D) AlSiTiO<sub>2</sub>, and fits the real effect obtained experimentally for 24h, 48h and 72h after treatment.
