# Supplementary material for: TiO2 Nanomaterials Non-Controlled Contamination Could Be Hazardous for Normal Cells Located in the Field of Radiotherapy
Source: MDPI journal article supplement (doi:10.3390/ijms21030940), 2020-01-31
Supplement: s1 [file s1]

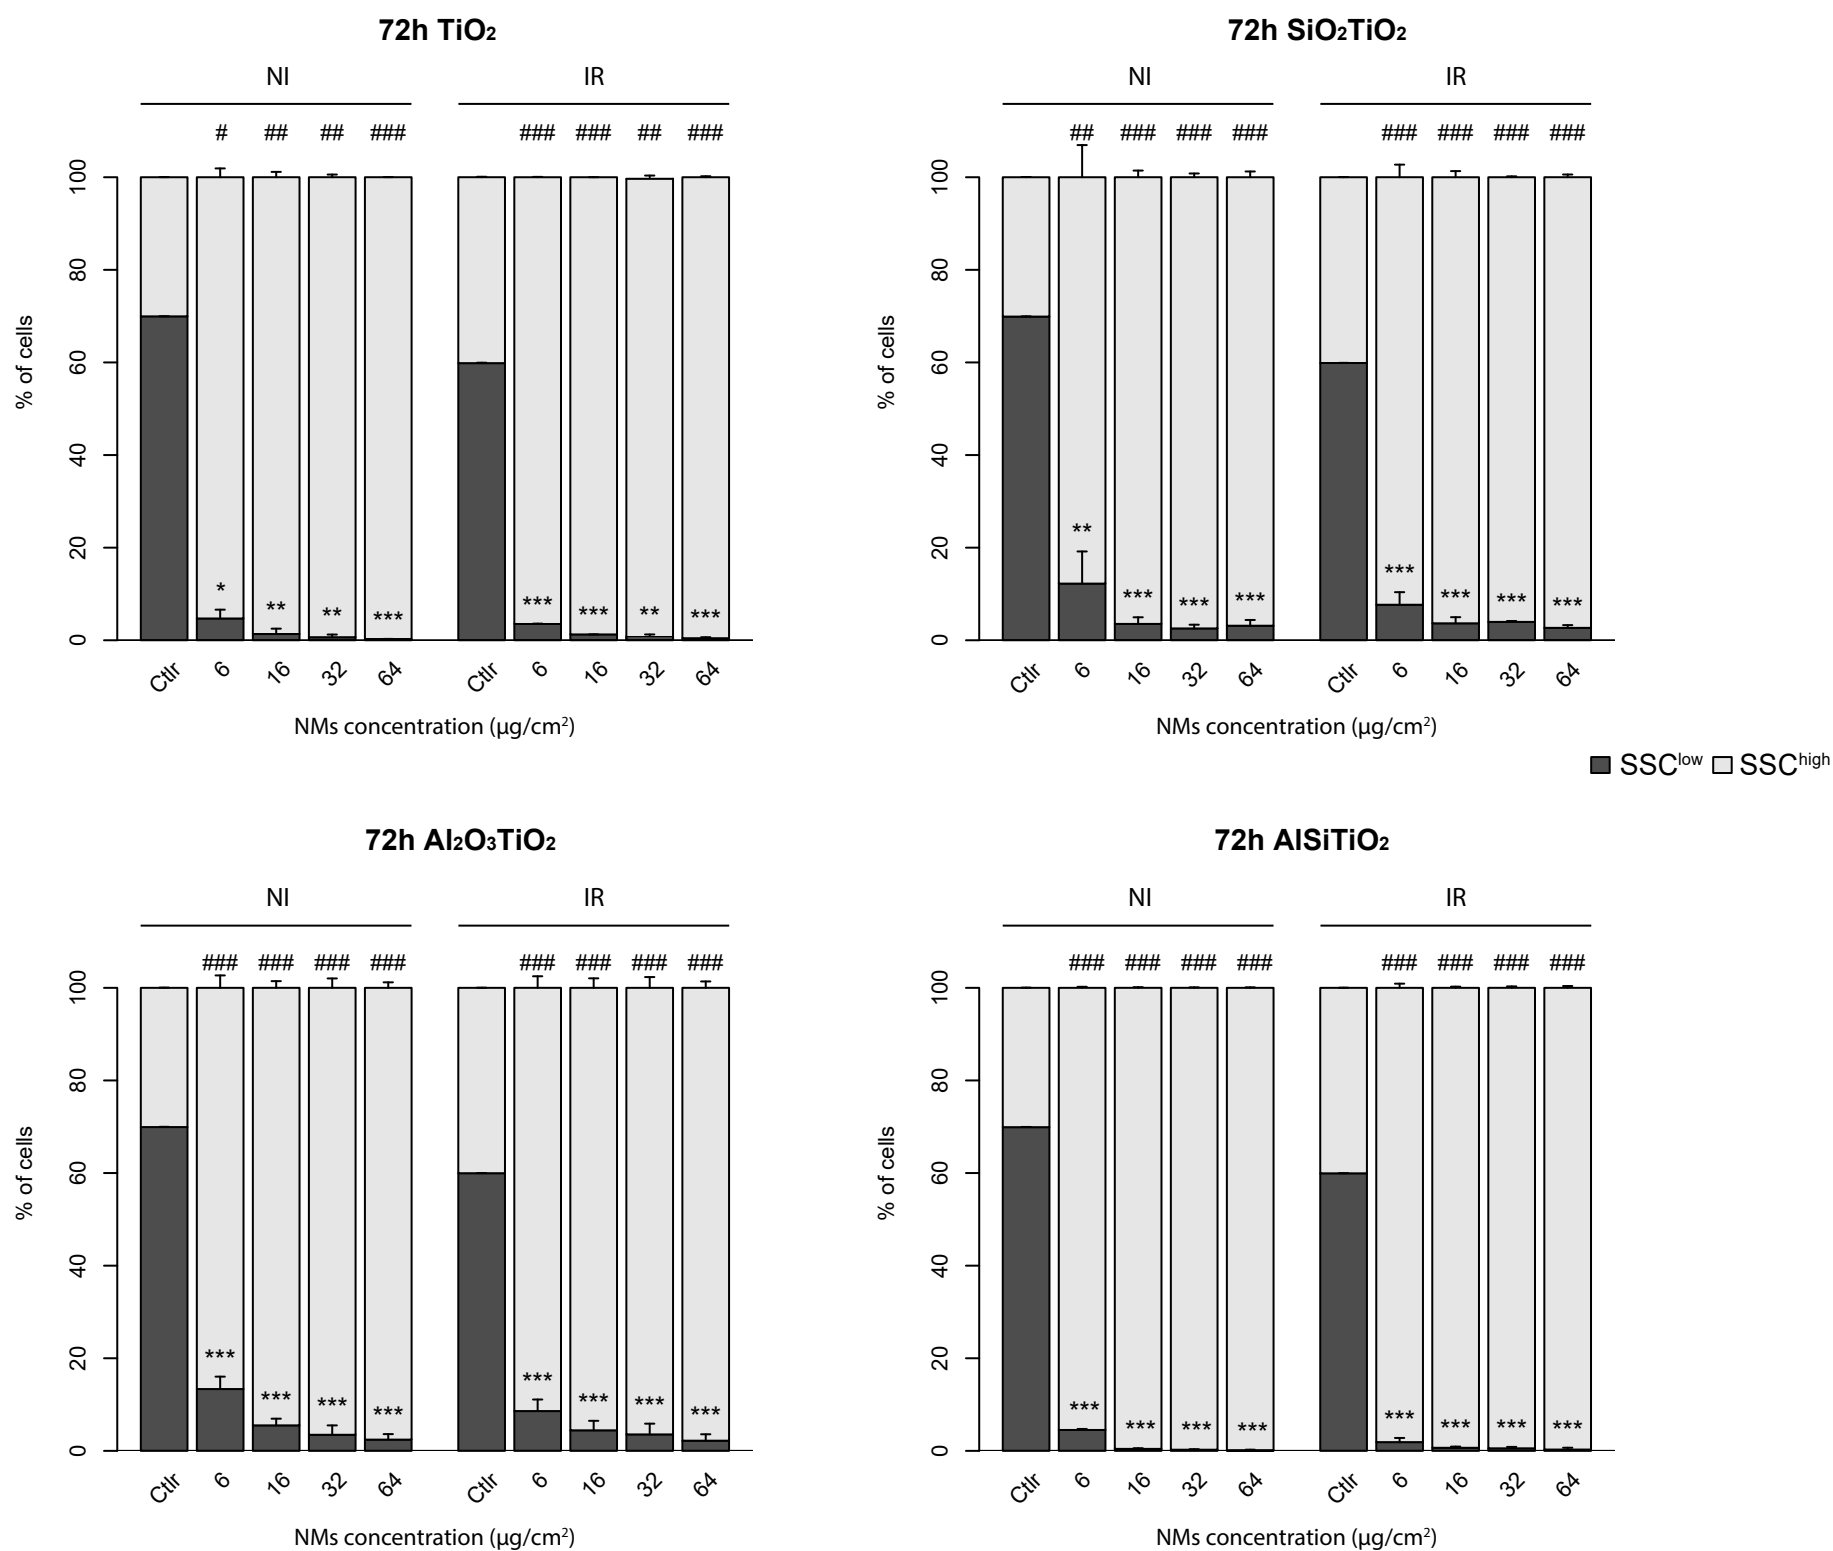

**Fig. S1b: NMs internalization into 16HBE cells at 72h after treatment.**

Same thresholds are applied and the percentage of SSC<sup>low</sup> and SSC<sup>high</sup> cells are represented here. (means ± S.E.M., n=3, \*\*\*P<0.001 (Welch t-test), as compared to the percentage of SSC<sup>low</sup> of the control group, ###P<0.001 (Welch t-test), as compared to the percentage of SSC<sup>high</sup> of the control group.)
