# Supplementary material for: TiO2 Nanomaterials Non-Controlled Contamination Could Be Hazardous for Normal Cells Located in the Field of Radiotherapy
Source: MDPI journal article supplement (doi:10.3390/ijms21030940), 2020-01-31
Supplement: s1 [file s1]

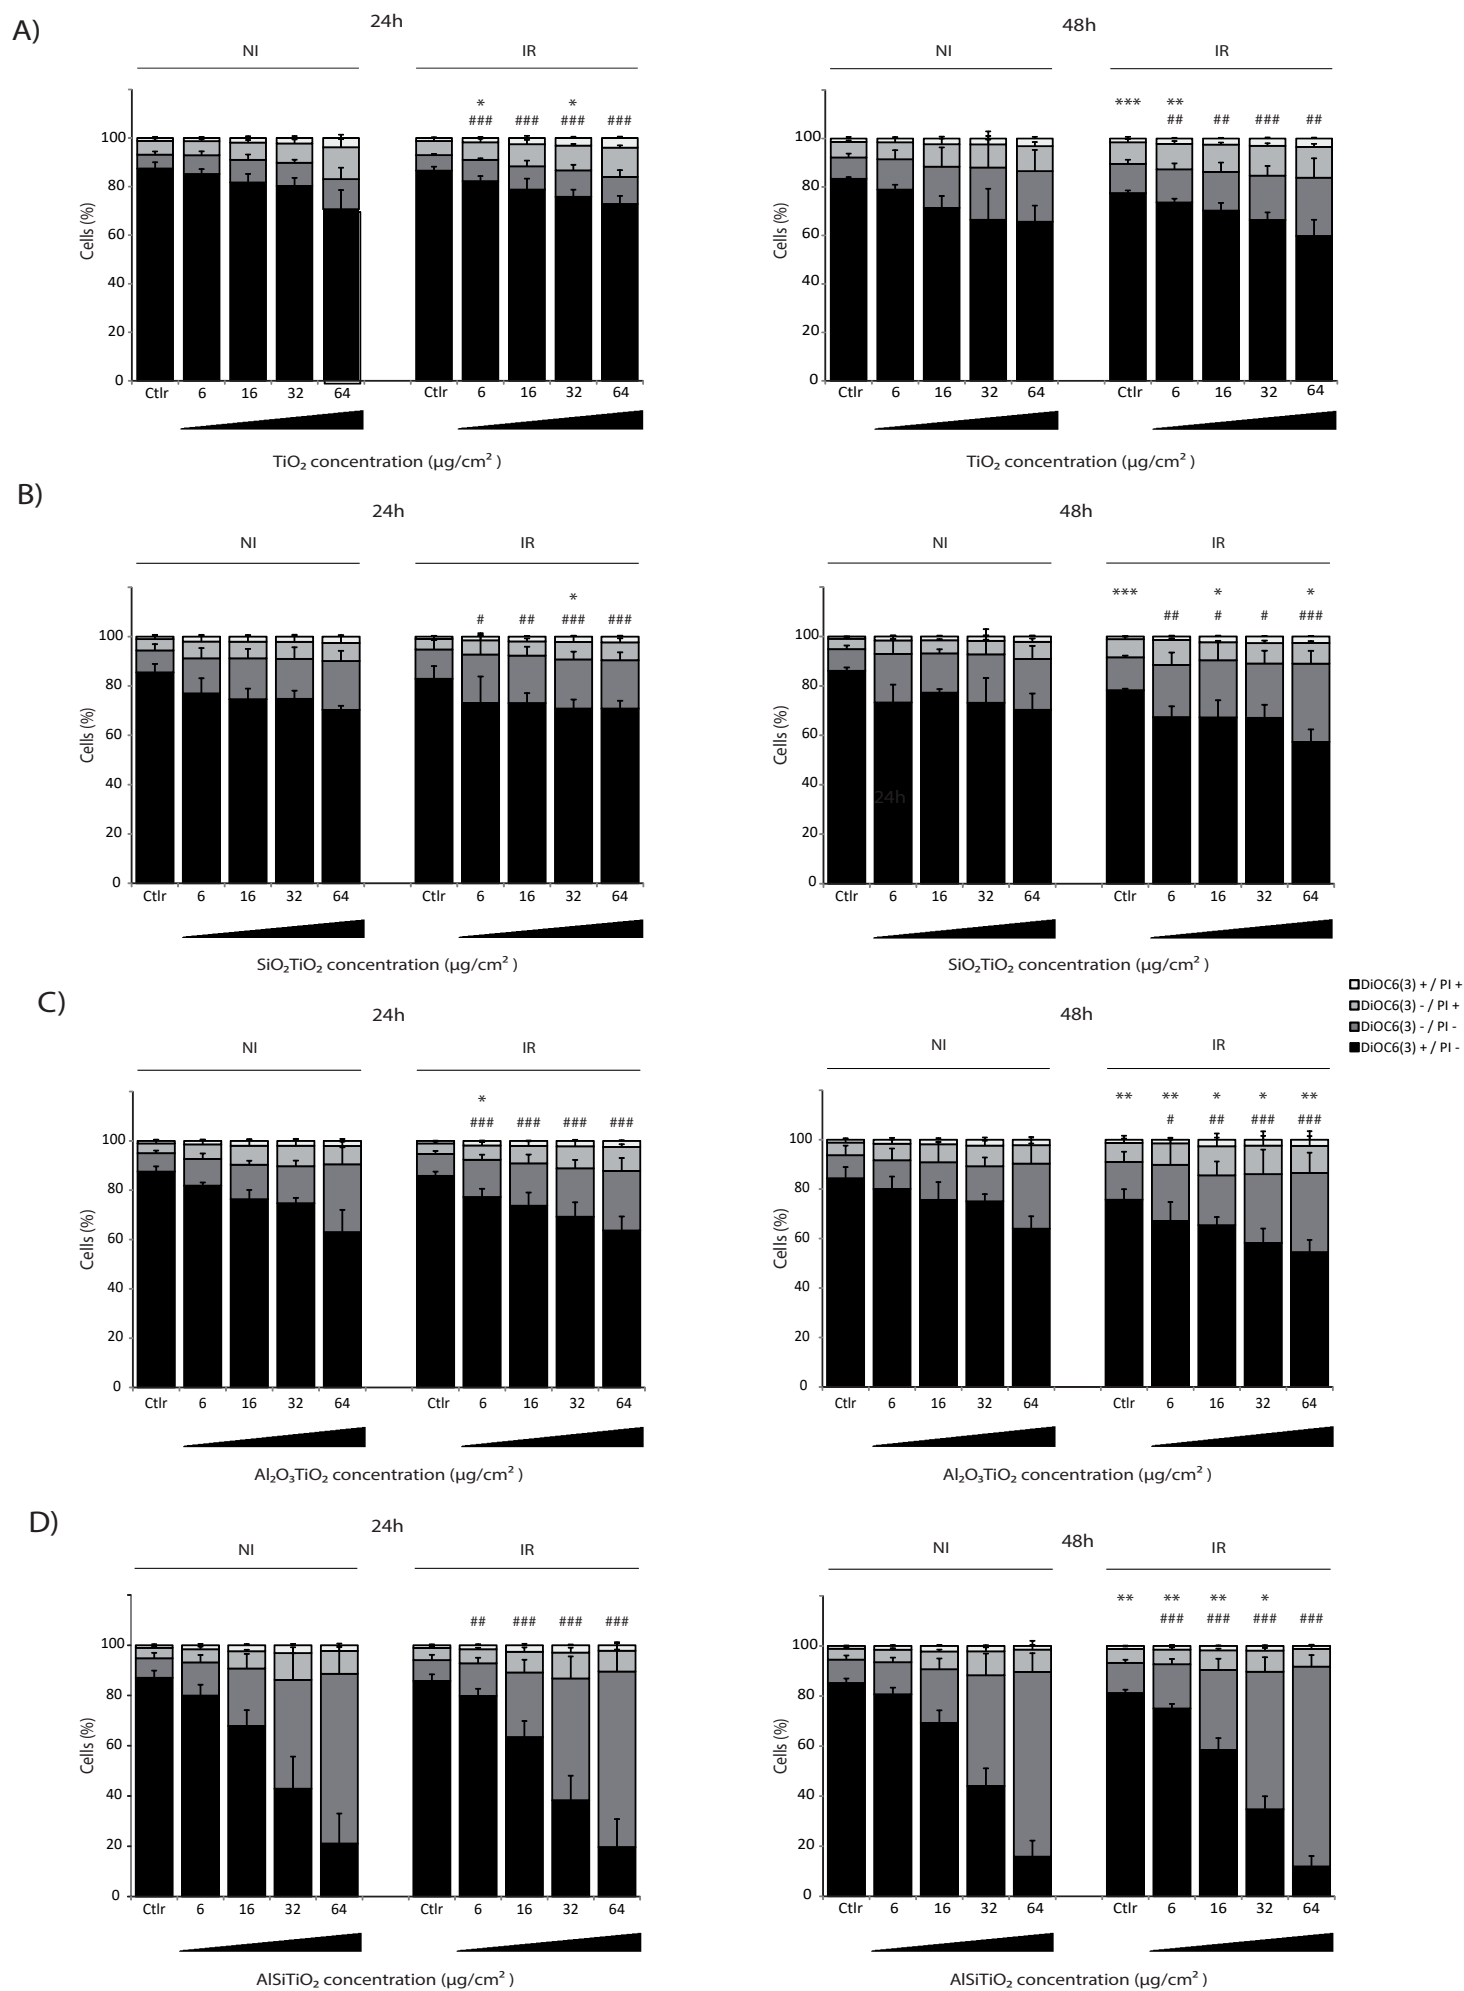

**Fig S2. Cell death assays 24h or 48h after TiO<sub>2</sub> treatment combined or not with irradiation**

Representative dot plots and quantitative data are reported (means ± S.D, n=3, except for A) 24h n=4, A) 48h and B) 24h n=4). \*P<0.05, \*\*P<0.01, \*\*\*P<0.001 (Student's t-test), as compared with cells maintained in same conditions but non-irradiated. #P<0.05, ##P<0.01, ###P<0.001 (Student's t-test), as compared with IR cells maintained in control (Ctrl) condition.)
